# Supplementary material
Source: PubMed Central journal article supplement (PMC2906560)
Supplement: 1006645107_pnas.201006645SI.pdf [file 1006645107_pnas.201006645SI.pdf]

# Supporting Information

Wang et al. 10.1073/pnas.1006645107

## SI Discussion

In birds, both the medial and lateral portions of the CM are auditory telencephalic nuclei and connected with the Field L via monosynaptic and/or polysynaptic pathways. In chicks, the boundaries between the medial and lateral CM are ambiguous. Although our injections were located mostly in the more medial portion of the CM, we chose to describe the studied mesopallium region using the more general nomenclature “caudal mesopallium” for accuracy.

The traditional definition of the Field L2 in birds contains two divisions, a medial portion (L2a) and a more laterally located portion (L2b). The present study focuses on the similarities between the avian L2a and the mammalian A1, both of which are primary cortical targets of the tonotopically organized lemniscal auditory system. In contrast, neurons in L2b receive auditory inputs from separate ascending pathways and exhibit broad frequency tuning. The equivalent component of the avian L2b in mammals remains unknown. The organization and connection of L2b were not examined in the present study.

It is noteworthy that the general pattern of intrinsic connections of the Field L/CM complex in chicks is consistent with that reported in previous studies in two other avian species. In zebra finches, each subunit of the complex (CM, L1, L2a, L3) connects with another subunit through reciprocal connections (1). We identified the majority of these connections in chicks, but found no evidence of a substantial projection of L1 to other regions of the Field L. In chicks, L1 provides a major output layer of the complex, consistent with studies in pigeons (2). The pattern of the intrinsic connectivity of the complex appears to be less complicated in pigeons than in zebra finches and chicks, with only two projections identified (2). These discrepancies across studies might be due to interspecies variation and/or technical limitations. Given the complexity of the interconnections across layers, exploration of the intrinsic detailed organization of the complex must be conducted at the individual cell level.

The remarkable similarities between the mammalian A1 neocortex and the avian auditory cortex, as described above, emphasize the need to reevaluate our concepts of the uniqueness of cortical networks in mammals and their evolutionary origins. These findings further challenge the views that the avian Field L/CM complex is homologous to a part of the mammalian amygdala, endopiriform area, or claustrum instead of A1 (3–7). This reasoning is based on selective data from gene expression and development, as well as a disputed direct thalamic input to the amygdala and claustrum, which has been interpreted as being homologous to the avian Ov-Field L pathway. However, the thalamic inputs to the claustrum and amygdala originate from the medial and dorsal divisions of the medial geniculate nucleus, the posterior intralaminar nucleus, and the supragenulate nucleus (8), which are components of the secondary or nonlemniscal auditory pathway characterized by polysensory inputs in addition to broad frequency tuning and lack of tonotopy (9). In contrast, the avian Field L/CM and the mammalian A1 are the major telencephalic targets of the lemniscal auditory pathway via the mammalian MGv and the avian Ov, which are characterized by sharp frequency tuning and tonotopic organization (9). The distinctly different sensory inputs of the mammalian amygdala/claustrum and the avian Field L/CM provide strong evidence against the proposed homology of these two structures. Another important difference between these two structures is that amygdala and claustrum do not display a columnar internal organization, although they do contain complex intrinsic connections among its subdivisions (10, 11).

## SI Materials and Methods

All experimental procedures used in this study were approved by the University of California San Diego's Animal Care and Use Committee and were in accordance with International Committee of Medical Journal Editors policy. Experiments were performed on White Leghorn chicks (*Gallus gallus*) of age <5 d.

### In Vitro BDA Tracing and Intracellular Filling in Slice Preparations.

The procedure has been described previously (12). Forty-one chicks were anesthetized with a mixture of 40 mg/kg of ketamine and 12 mg/kg of xylazine, and then decapitated. Brain slices (300  $\mu\text{m}$  thick) through the Field L/CM complex were prepared in a modified coronal plane that may best conform to the radial plane or orientation first suggested by Bonke et al. (13). Layers of the complex were readily identified in wet tissue as four approximately parallel bands of differing brightness. BDA was injected extracellularly into individual layers using a glass electrode filled with 10% BDA either by pressure (30–150 nL in volume) or iontophoretically (positive current of 2–10  $\mu\text{A}$  for 10 min). Intracellular filling of individual neurons was conducted in different slices with an electrode (100–300 M $\Omega$ ) filled with 4% biocytin in 0.3 M KAc. Cell penetration was indicated by a sudden negative voltage drop and cell discharges. Biocytin was iontophoresed into the neuron with 2–3 nA of positive current for 3 min. Only one cell was filled in a single slice. Localization of BDA and biocytin were subsequently visualized by the standard avidin-biotin-peroxidase method, and sections were counterstained with Giemsa for identification of layers. In total, 21 slices with identifiable lamination, a clean BDA injection site, and good transportation of the tracer were chosen from 65 injected slices for data analyses; the injection sites are listed in Table S1. Nine neurons were filled intracellularly with their somata located in CM ( $n = 3$ ), L1 ( $n = 1$ ), L2 ( $n = 4$ ), and L3 ( $n = 1$ ).

**Parvalbumin Immunocytochemistry.** The procedure has been described previously (12). In brief, two chicks were transcardially perfused with 0.9% saline followed by 4% paraformaldehyde. After postfixation and sucrose equilibration of the brain, 30- $\mu\text{m}$  coronal sections were acquired using a freezing sliding microtome. Free-floating sections were incubated with primary antibody solution (1:10,000; Sigma-Aldrich; lot #017H4821) overnight at 4  $^{\circ}\text{C}$ , followed by biotinylated anti-IgG antibody (1:200) for 1 h at room temperature. Localization of parvalbumin immunoreactivity was subsequently visualized by the standard avidin-biotin-peroxidase method. The localization pattern in the Field L/CM complex was consistent in the two chicks.

**Cell Reconstruction and Measurement.** Tracing of labeled neuronal structures after BDA extracellular injections was done with a camera lucida on a Zeiss WL microscope from individual resectioned 80- $\mu\text{m}$ -thick sections. Slices with injections of BDA-conjugated rhodamine were observed and reconstructed using an Olympus FV-300 confocal microscope. For intracellularly filled neurons, axons from three adjacent 80- $\mu\text{m}$ -thick sections containing the soma were reconstructed to provide a more complete tracing of axonal collaterals. The cell reconstructions were performed before Giemsa counterstaining to avoid obscuring fine cellular processes. All of the measurements, including soma size and dimensions of tracer transports, were done on calibrated images captured with a black and white (B/W) CCD camera, using Image software (National Institutes of Health). No corrections were made for tissue shrinkage.





**Table S1. Injection site, injection method applied, and the distribution and number of labeled neurons following extracellular injections of BDA into the Field L/CM complex**

| Injection site | Injection method | Size of column ( $\mu\text{m}$ )* |            |           | Number of labeled neurons <sup>†</sup> |    |     |    |
|----------------|------------------|-----------------------------------|------------|-----------|----------------------------------------|----|-----|----|
|                |                  | Long axis                         | Short axis | Ratio (%) | CM                                     | L1 | L2a | L3 |
| CM             | Pressure         | 1,251                             | 573        | 46        | —                                      | 11 | 12  | 4  |
| CM             | Pressure         | 1,135                             | 635        | 56        | —                                      | 11 | 28  | 0  |
| CM             | Pressure         | 1,291                             | 587        | 45        | —                                      | 17 | 9   | 1  |
| CM             | Iontophoresis    | 492                               | 193        | 39        | —                                      | 3  | 0   | 1  |
| CM and L1-ext  | Pressure         | 1,253                             | 421        | 34        | —                                      | —  | 35  | 5  |
| L1             | Pressure         | 916                               | 319        | 35        | 13                                     | —  | 22  | 2  |
| L1             | Pressure         | 1,495                             | 705        | 47        | 24                                     | —  | 9   | 4  |
| L1             | Pressure         | 983                               | 407        | 41        | 19                                     | —  | 22  | 0  |
| L1             | Iontophoresis    | 1,405                             | 465        | 33        | 22                                     | —  | 6   | 4  |
| L1-int and L2a | Pressure         | 1,705                             | 894        | 52        | 49                                     | —  | —   | 10 |
| L1-int and L2a | Iontophoresis    | 1,187                             | 568        | 48        | 4                                      | —  | —   | 3  |
| L1-int and L2a | Iontophoresis    | 1,748                             | 765        | 44        | 14                                     | —  | —   | 5  |
| L1 and L2a     | Pressure         | 1,373                             | 660        | 48        | 9                                      | —  | —   | 1  |
| L1 and L2a     | Iontophoresis    | 1,868                             | 801        | 43        | 22                                     | —  | —   | 2  |
| L2a            | Pressure         | 1,653                             | 341        | 21        | 16                                     | 1  | —   | 10 |
| L2a            | Pressure         | 1,355                             | 667        | 49        | 12                                     | 6  | —   | 10 |
| L2a            | Pressure         | 1,359                             | 631        | 46        | 4                                      | 1  | —   | 5  |
| L2a            | Pressure         | 1,288                             | 323        | 25        | 8                                      | 0  | —   | 8  |
| L2a            | Pressure         | 1,190                             | 551        | 46        | 15                                     | 0  | —   | 6  |
| L2a and L3     | Pressure         | 1,212                             | 281        | 23        | 10                                     | 1  | —   | —  |
| L2a and L3     | Iontophoresis    | 807                               | 268        | 33        | 6                                      | 0  | —   | —  |

The cases are ordered by their injection sites. No notable differences in the patterns of labeling were detected between injections restricted to one layer and those involved with two layers.

\*The extent of the column was determined by the distribution of labeled neurons. Labeled fibers mostly coursed within the column but also extended beyond its borders. The long and short axes of the column were measured from a single section for each case. Ratio refers to the length of the short axis divided by that of the long axis.

<sup>†</sup>The numbers of labeled neurons were counted for each layer of each case. Neurons were counted from either one section or two adjacent sections for each case. Labeled neurons in the layer(s) in which the injection site was located were not counted.
